# Supplementary material for: An electrochemiluminescence assay for sensitive detection of methyltransferase activity in different cancer cells by hybridization chain reaction coupled with a G-quadruplex/hemin DNAzyme biosensing strategy
Source: Royal Society of Chemistry journal article supplement (doi:10.1039/c7an00486a), 2017-01-01
Supplement: c7an00486a1.pdf [file c7an00486a1.pdf]

# Electrochemiluminescence assay for sensitive detection of methyltransferase activity in different cancer cells by hybridization chain reaction coupled with G-quadruplex/hemin DNAzyme biosensing strategy

Hui Zhang\*, Zhihui Guo, Huilei Dong, Hongfei Chen and Chenxin Cai

Jiangsu Key Laboratory of New Power Batteries, Jiangsu Collaborative Innovation Center of Biomedical Functional Materials, Jiangsu Key Laboratory of Biomedical Materials, National and Local Joint Engineering Research Center of Biomedical Functional Materials, College of Chemistry and Materials Science, Nanjing Normal University, Nanjing 210097, P. R. China.

E-mail: zhangh@njnu.edu.cn (H. Zhang)

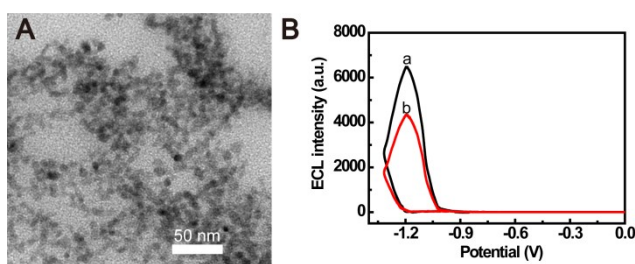

Fig. S1 (A) TEM image of MPA-CdS:Eu NCs and (B) ECL-potential curves of (a) MPA-CdS:Eu NCs and (b) MPA-CdS NC-modified GCE in 0.1M PBS (pH 8.5).

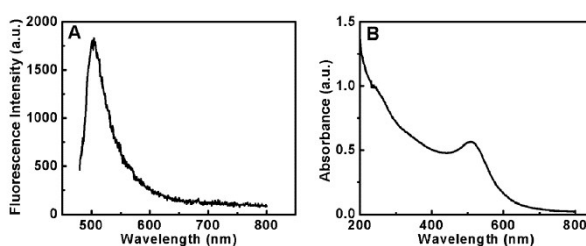

Fig. S2 (A) Fluorescence spectrum of MPA-CdS:Eu NCs and (B) UV-vis absorption spectrum of Au NPs.

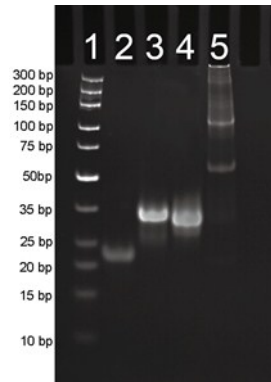

Fig. S3 Native polyacrylamide gel electrophoresis (PAGE) of different samples. Lane 1: the standard DNA marker of 10, 15, 20, 25, 35, 50, 75, 100, 150, 200 and 300 bp of DNA sequence; Lane 2: 5  $\mu$ M Prime DNA; Lane 3: 5  $\mu$ M Helper 1 DNA; Lane 4: 5  $\mu$ M Helper 2 DNA; Lane 4: 5  $\mu$ M Prime DNA , 5  $\mu$ M Helper 1 DNA, 5  $\mu$ M Helper 2 DNA, 0.15 mM hemin, 0.1 M K<sup>+</sup> formed G-quadruplex/hemin DNAzymes in 37 °C for 2 h.
